# Supplementary material for: A high-throughput method for the quantification of iron saturation in lactoferrin preparations
Source: PubMed Central journal article supplement — Anal Bioanal Chem. 2013 Apr 21;405(15):5191–200. doi: 10.1007/s00216-013-6943-9 (PMC3656221; doi:10.1007/s00216-013-6943-9), 2013-04-21
Supplement: 216_2013_6943_MOESM1_ESM.pdf [file 216_2013_6943_MOESM1_ESM.pdf]

## A high-throughput method for the quantification of iron saturation in lactoferrin preparations

Grzegorz Majka, Klaudyna Śpiewak, Katarzyna Kurpiewska, Piotr B. Heczko, Grażyna Stochel, Magdalena Strus, Małgorzata Brindell

**Table S1.** Comparison of the absorbance coefficients values for apo- and hololactoferrin based on literature data

|                 | $\lambda$ [nm] | $\varepsilon$ [ $M^{-1}cm^{-1}$ ] | Ref. |
|-----------------|----------------|-----------------------------------|------|
| apolactoferrin  |                | 109000                            | [1]  |
|                 | 280            | 98400*                            | [2]  |
|                 |                | 101600*                           | [3]  |
|                 | 279            | 88500                             | [4]  |
|                 | 278            | 107000                            | [5]  |
| hololactoferrin | 280            | 135000                            | [1]  |
|                 |                | 112000*                           | [6]  |
|                 | 465            | 2800                              | [5]  |
|                 |                | 4640*                             | [6]  |
|                 | 466            | 2300                              | [7]  |
|                 | 470            | 2300                              | [8]  |

\* recalculated based on information about A1% or A0.1% for denoted wavelength

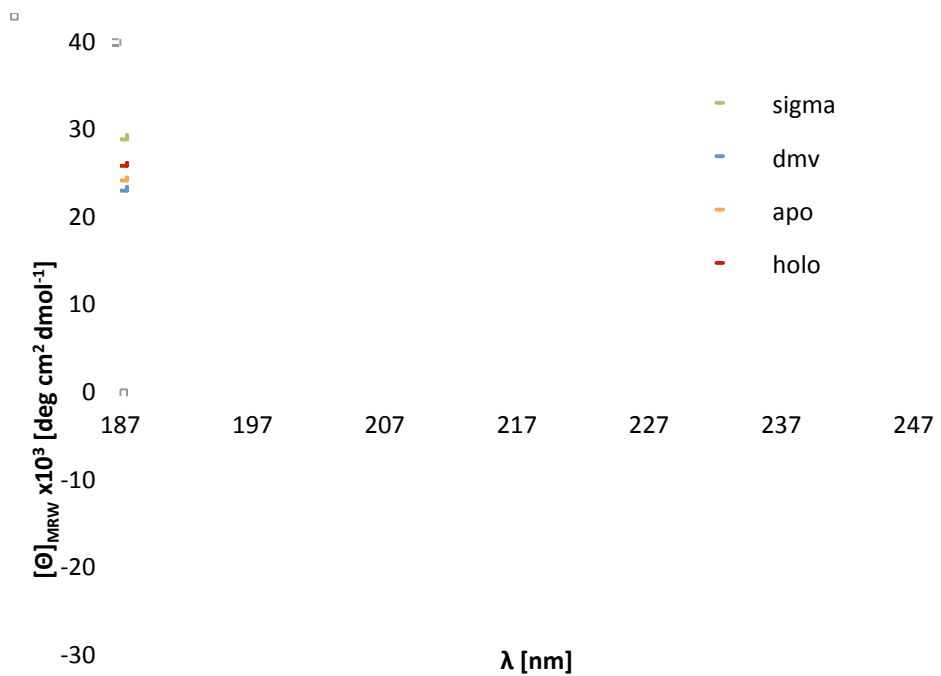

**Fig. S1.** Circular dichroism spectra of native lactoferrin obtained from Sigma-Aldrich (green) and DMV Int. (blue) companies as well as the apo- (< 2% of iron saturation) and holo-Lf (> 65% iron saturation) produced by us

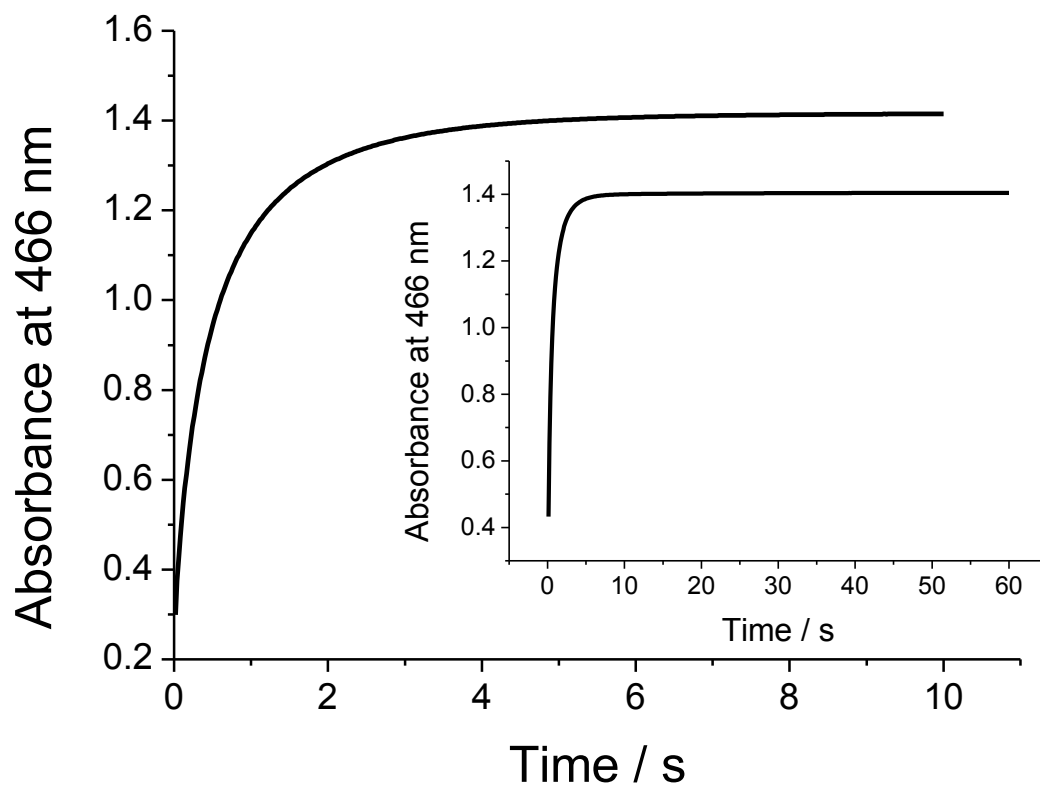

**Fig. S2.** The increase in the absorbance monitored at 466 nm upon mixing of native lactoferrin (Lf) with a mixture of  $\text{Fe}(\text{NO}_3)_3$  and nitrilotriacetic acid (NTA). Experimental conditions:  $[\text{Lf}] = 0,32 \text{ mM}$ ,  $[\text{Fe}^{3+}] = 1,28 \text{ mM}$ ,  $[\text{NTA}] = 1,28 \text{ mM}$ ,  $[\text{NaCl}] = 150 \text{ mM}$ ,  $50 \text{ mM}$  Tris-HCl buffer,  $\text{pH} = 7.4$ ,  $T = 25 \text{ }^\circ\text{C}$

## References

1. Brown EM, Parry RM (1974) Spectroscopic study of bovine lactoferrin. *Biochemistry (Mosc)* 13 (22):4560-4565.
2. Recio I, Visser S (1999) Two ion-exchange chromatographic methods for the isolation of antibacterial peptides from lactoferrin: In situ enzymatic hydrolysis on an ion-exchange membrane. *J Chromatogr* 831 (2):191-201.
3. Aisen P, Leibman A (1972) Lactoferrin and transferrin: a comparative study. *Biochim Biophys Acta - Protein Struct* 257 (2):314-323.
4. Aasa R, Malmström BG, Saltman P, Vänngård T (1963) The specific binding of iron(III) and copper(II) to transferrin and conalbumin. *Biochim Biophys Acta* 75 (0):203-222.
5. Harris WR (1986) Thermodynamics of gallium complexation by human lactoferrin. *Biochemistry (Mosc)* 25 (4):803-808.
6. Cox TM, Mazurier J, Spik G, Montreul J, Peters TJ (1979) Iron binding proteins and influx of iron across the duodenal brush border: Evidence for specific lactotransferrin receptors in the human intestine. *Biochim Biophys Acta - Gen Subjects* 588 (1):120-128.
7. Aisen P, Listowsky I (1980) Iron transport and storage proteins. *Annu Rev Biochem* 49:357-393.
8. Chung TDY, Raymond KN (1993) Lactoferrin: the role of conformational changes in its iron binding and release. *J Am Chem Soc* 115 (15):6765-6768.
